# Supplementary material for: Characterisation of novel influenza‐derived HLA‐B*18:01‐restricted epitopes
Source: PubMed Central journal article supplement — Clin Transl Immunology. 2024 May 10;13(5):e1509. doi: 10.1002/cti2.1509 (PMC11087170; doi:10.1002/cti2.1509), 2024-05-10
Supplement: CTI2-13-e1509-s001.pdf [file CTI2-13-e1509-s001.pdf]

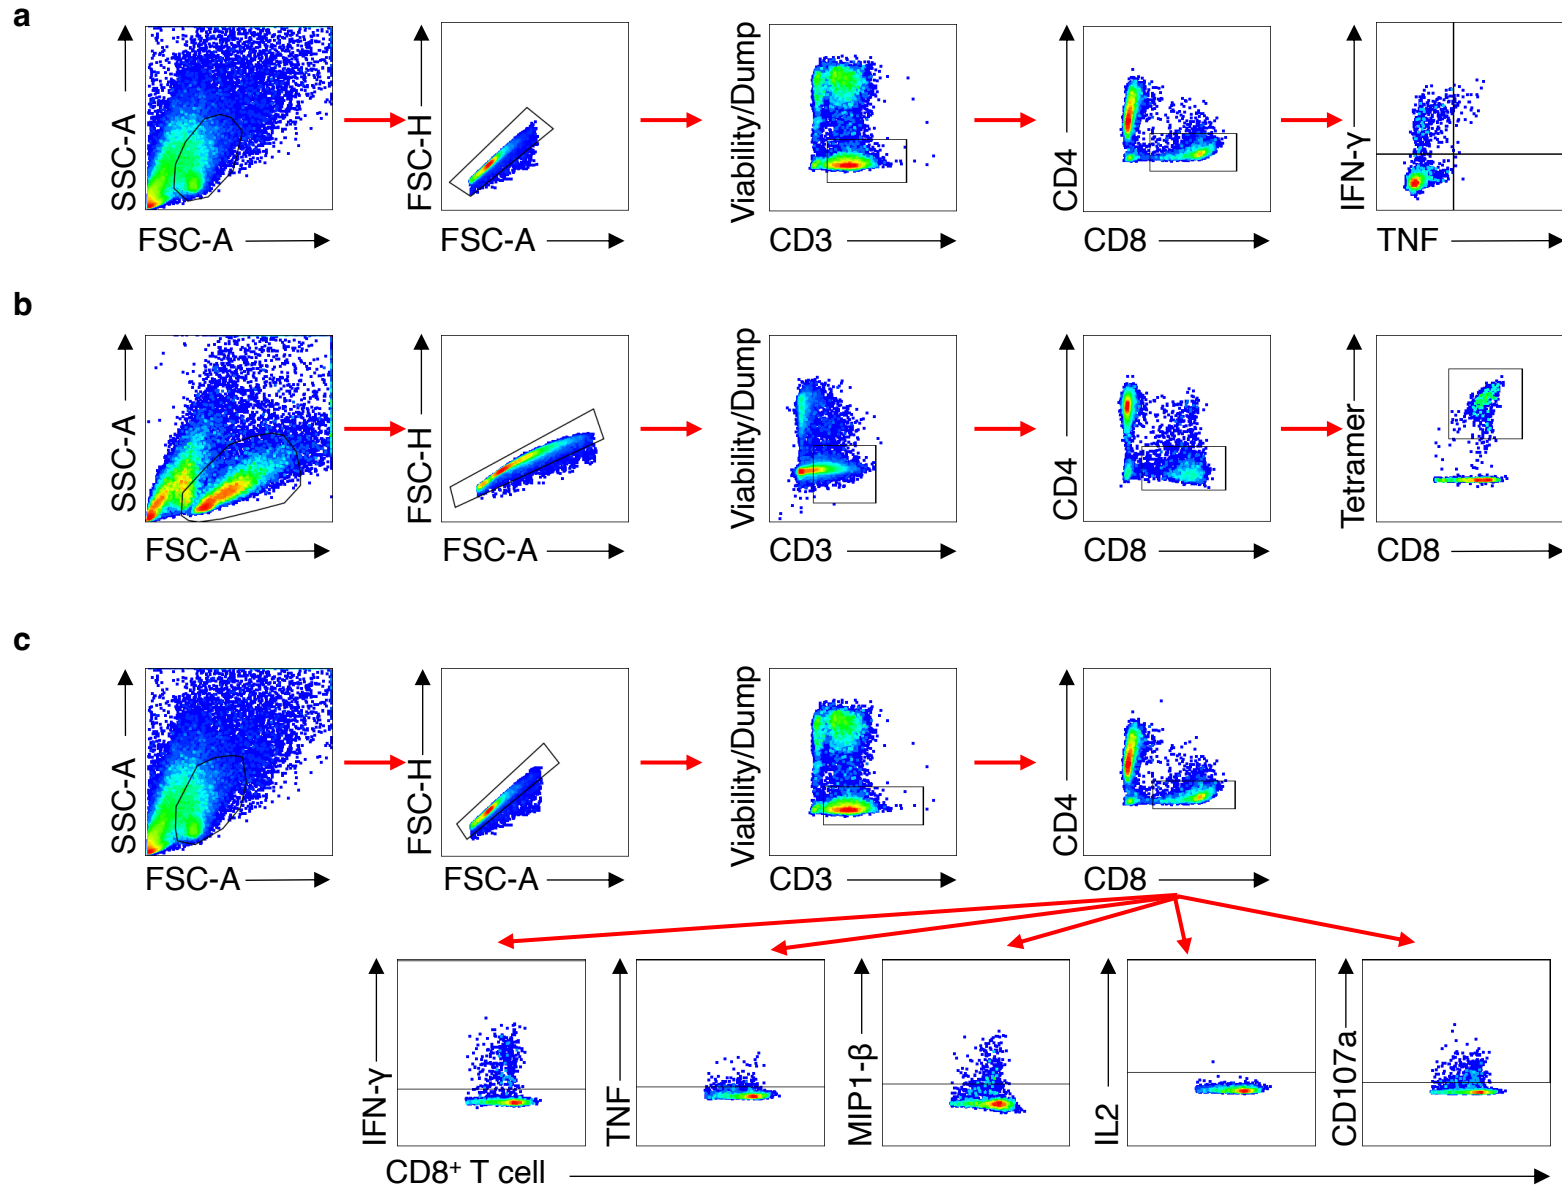

**Supplementary Figure 1. Gating Strategy.** Gating strategy used for all data in this manuscript. **(a)** Gating strategy for the analysis of specificity of CD8<sup>+</sup> T cell lines for Figures 1-2. Cells are gated on lymphocytes, singlets, Live CD3<sup>mid-high</sup>, CD8<sup>mid-high</sup> T cells and IFN $\gamma$  vs TNF, with the top two quadrants added to report the percentage of IFN $\gamma$ <sup>+</sup> of CD8<sup>+</sup> T cells. **(b)** Gating strategy for the specificity of CD8<sup>+</sup> T cell lines for Figure 2. Cells are gated on lymphocytes, singlets, Live CD3<sup>mid-high</sup>, CD8<sup>mid-high</sup> T cells and tetramer<sup>+</sup>CD8<sup>+</sup> T cells **(c)** Gating strategy for the analysis of polyfunctionality of CD8<sup>+</sup> T cell lines for Figures 3. Cells are gated on lymphocytes, singlets, Live CD3<sup>mid-high</sup>, CD8<sup>mid-high</sup> T cells and IFN- $\gamma$ , TNF, MIP1- $\beta$ , IL2 or CD107a which were subsequently analysed with Boolean gating.

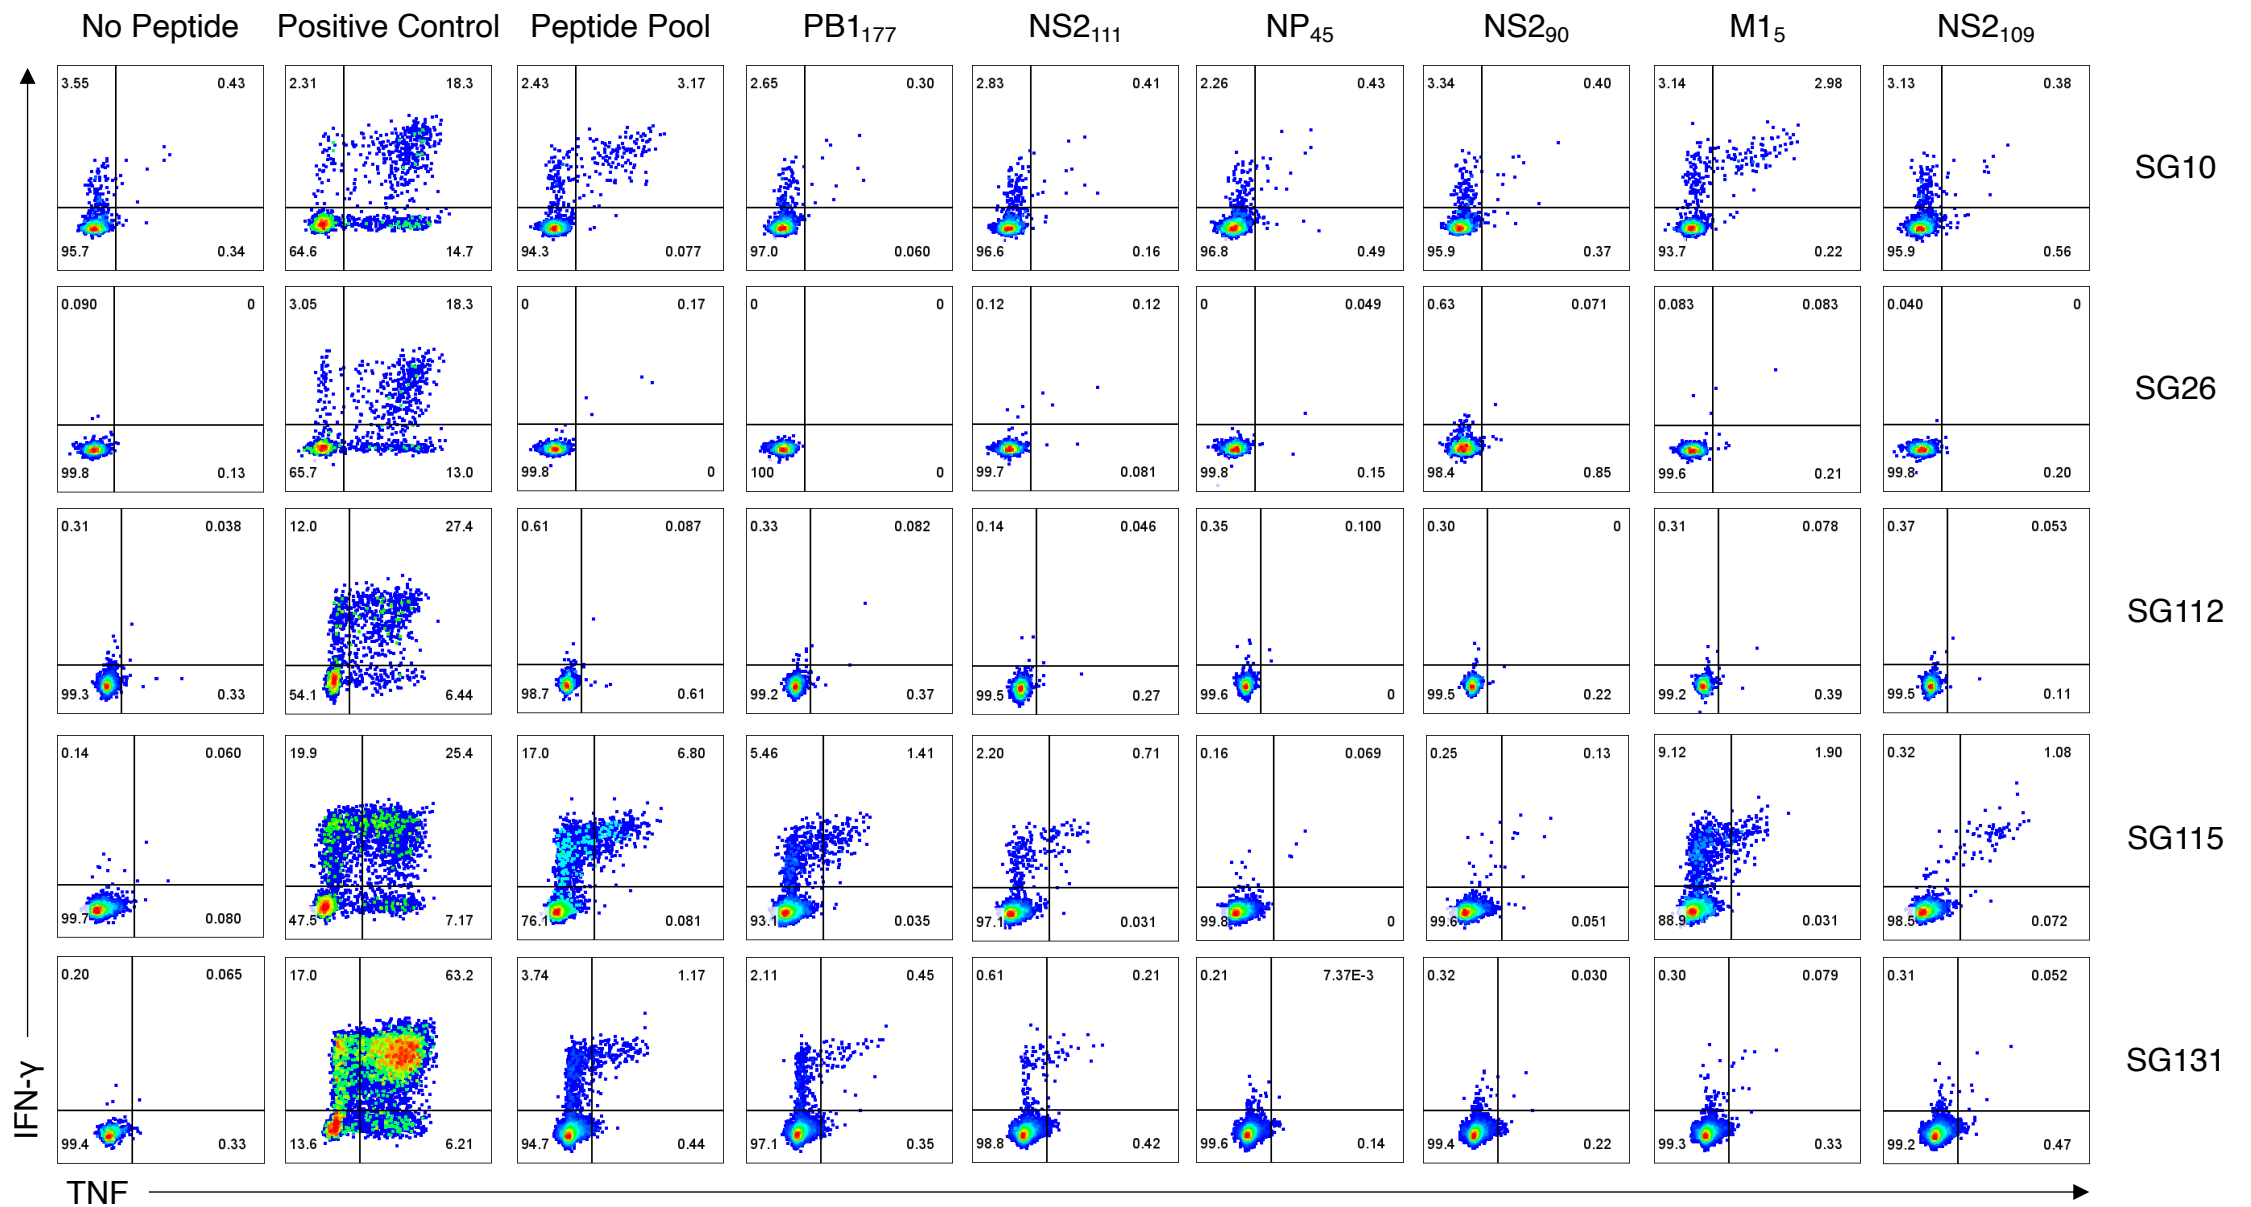

**Supplementary Figure 2. Summary of all intracellular cytokine staining from the initial peptide pool screening.**

PBMCs of five HLA-B\*18:01<sup>+</sup> donors (n=5) were stimulated with 2 mM per peptide pool condition (PB1<sub>177</sub>, NS2<sub>111</sub>, NP<sub>45</sub>, NS2<sub>90</sub>, M1<sub>5</sub>, and NS2<sub>109</sub>) for a period of 10<sup>+</sup> days. Intracellular cytokine staining was completed after 10<sup>+</sup> days by restimulating cells individually at 10 mM and 2mM/peptide for peptide pool conditions. All cell line conditions incorporated a x500 positive control and a no peptide negative control.

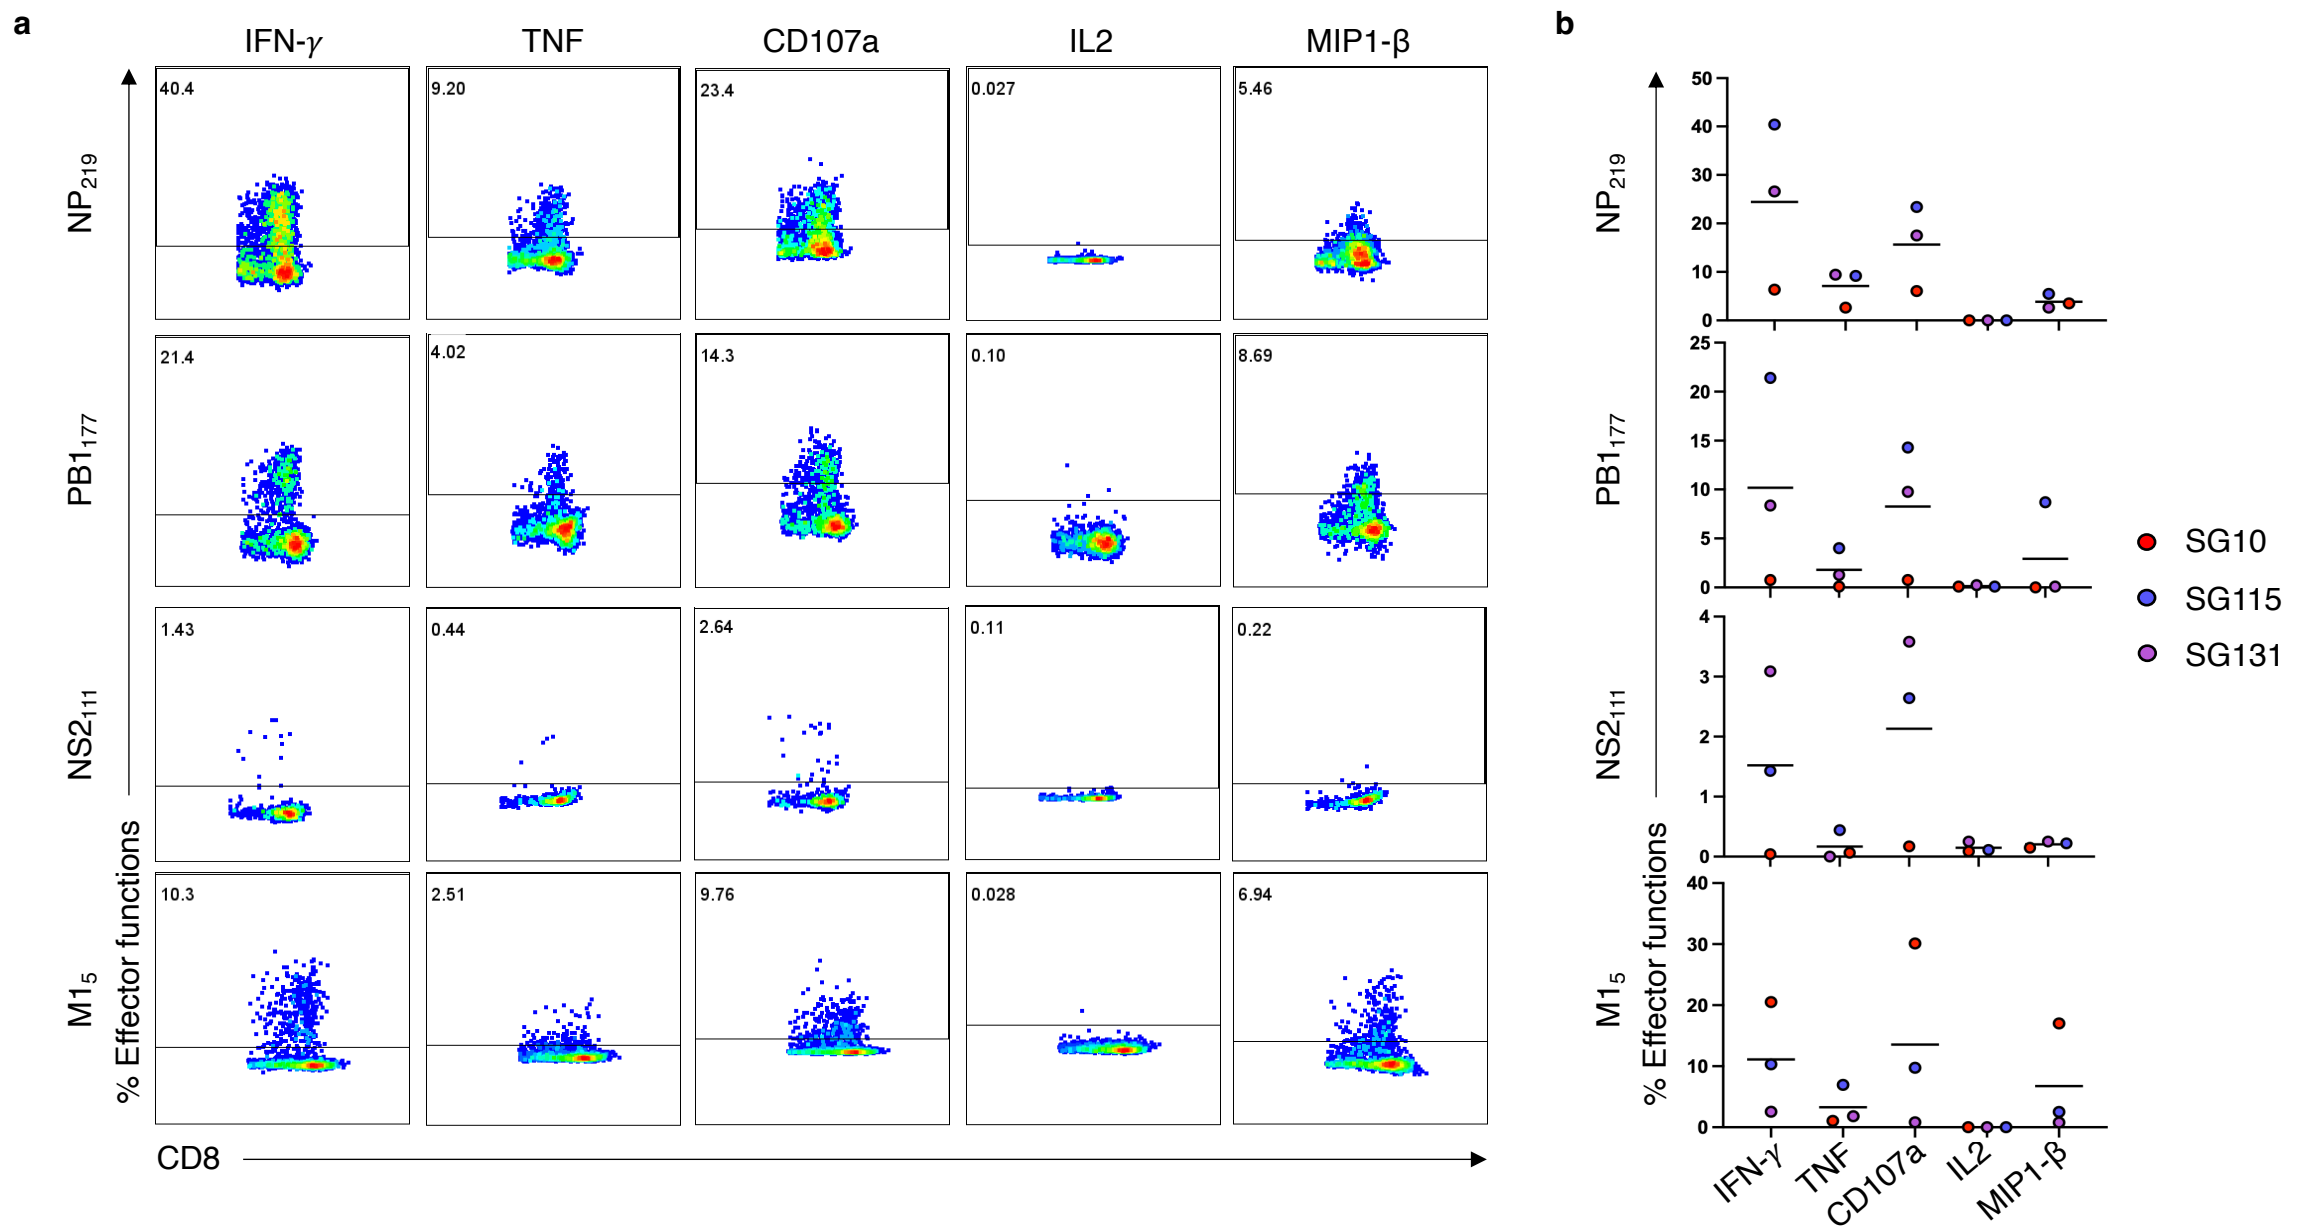

**Supplementary Figure 3. Effector function of peptide-specific CD8<sup>+</sup> T cell lines.**

PBMCs from three HLA-B\*18:01<sup>+</sup> donors (n=3) were stimulated with 10 mM of the NP<sub>219</sub>, PB1<sub>177</sub>, NS2<sub>111</sub> or M1<sub>5</sub> peptides individually and CD8<sup>+</sup> T cell function was measured in an ICS assay **(a)** Representative FACS plots and **(b)** Summary of all cytokines produced by CD8<sup>+</sup> T cell lines reported in Figures 2C and 3. The coloured dots represents a particular donor's effector response (red, SG10; blue, SG115; and purple, SG131).

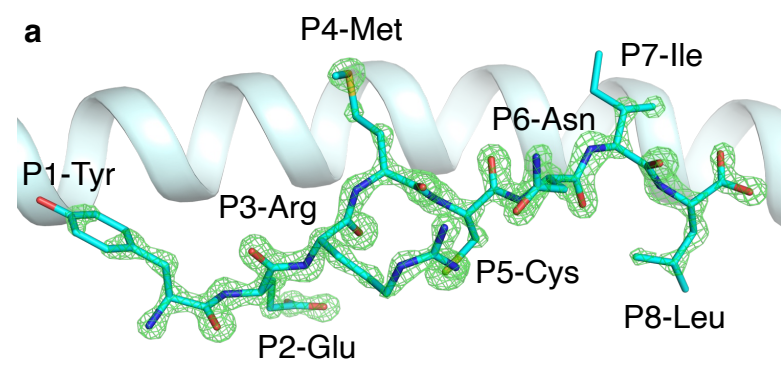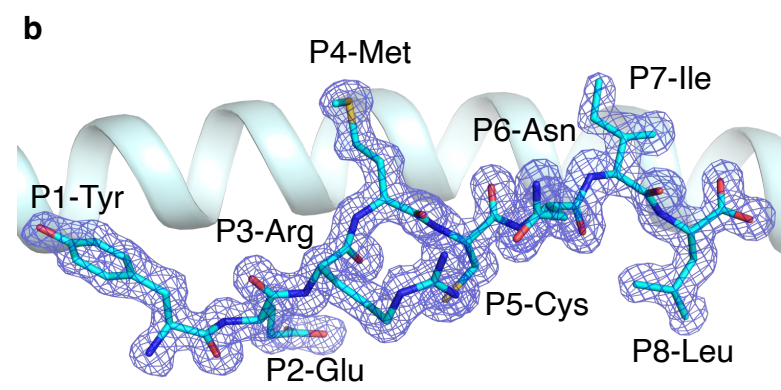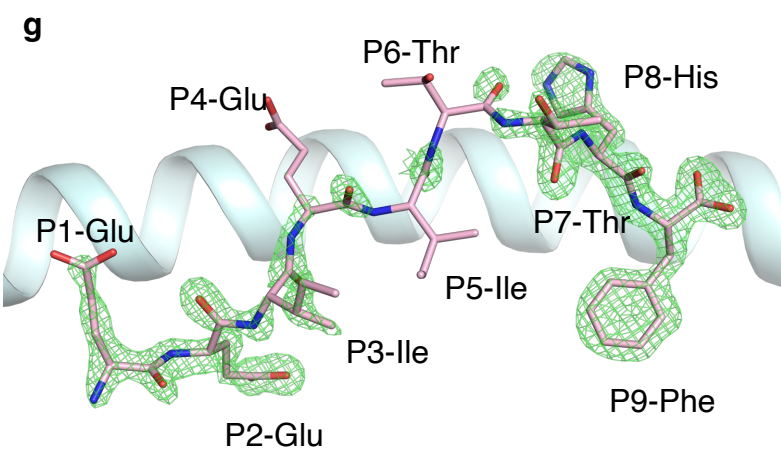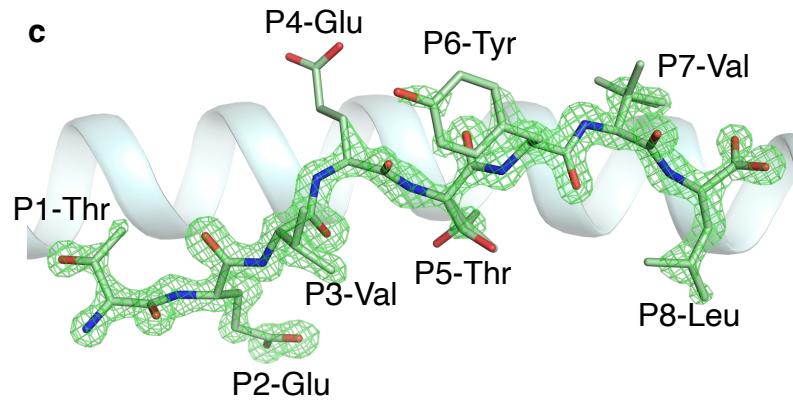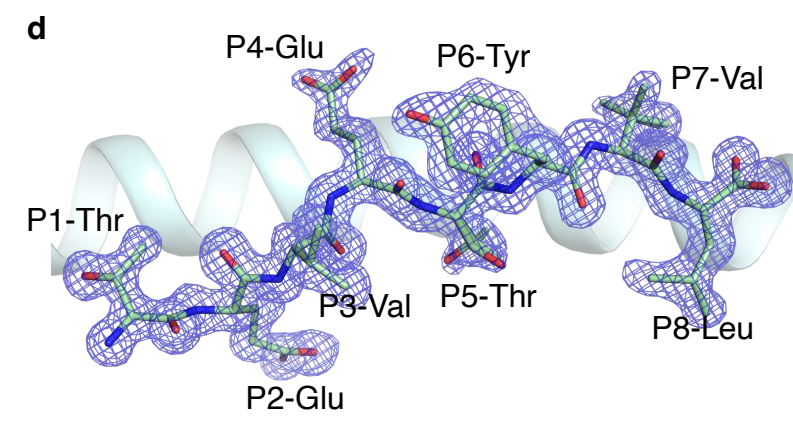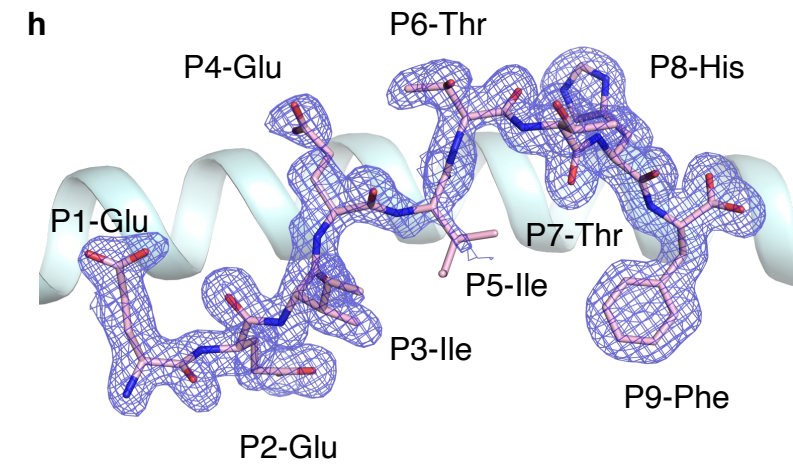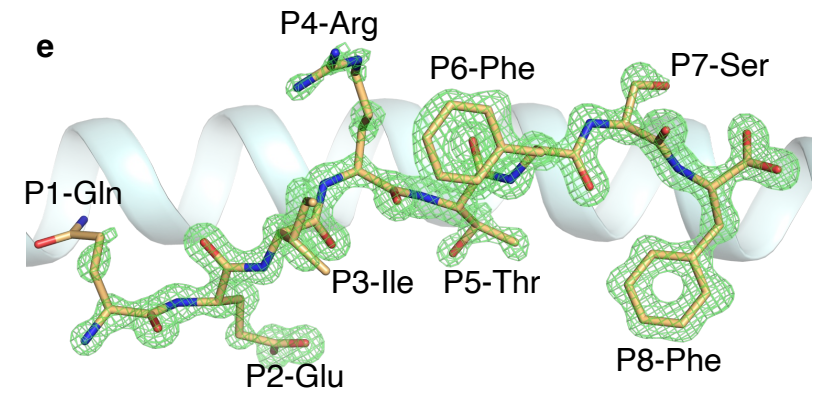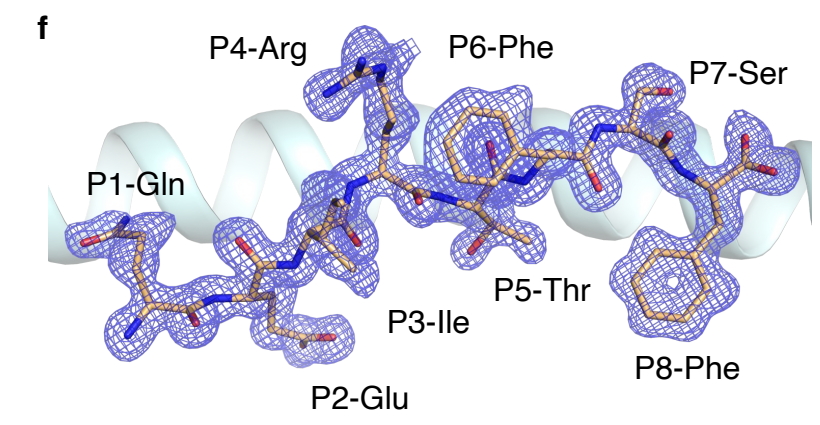

■ HLA-B\*18:01-NP<sub>219</sub>  
■ HLA-B\*18:01-M1<sub>5</sub>  
■ HLA-B\*18:01-NS<sub>211</sub>  
■ HLA-B\*18:01-PB<sub>117</sub>

**Supplementary Figure 4. Electron density maps for the four immunogenic peptides presented by HLA-B\*18:01.** Unbiased electron density (Fo-Fc, green at 3s) and final electron density (2Fo-Fc, blue at 1s) around the peptides NP<sub>219</sub> (**a**, **b**), M1<sub>5</sub> (**c**, **d**), NS<sub>211</sub> (**e**, **f**), and PB<sub>117</sub> (**g**, **h**), respectively.

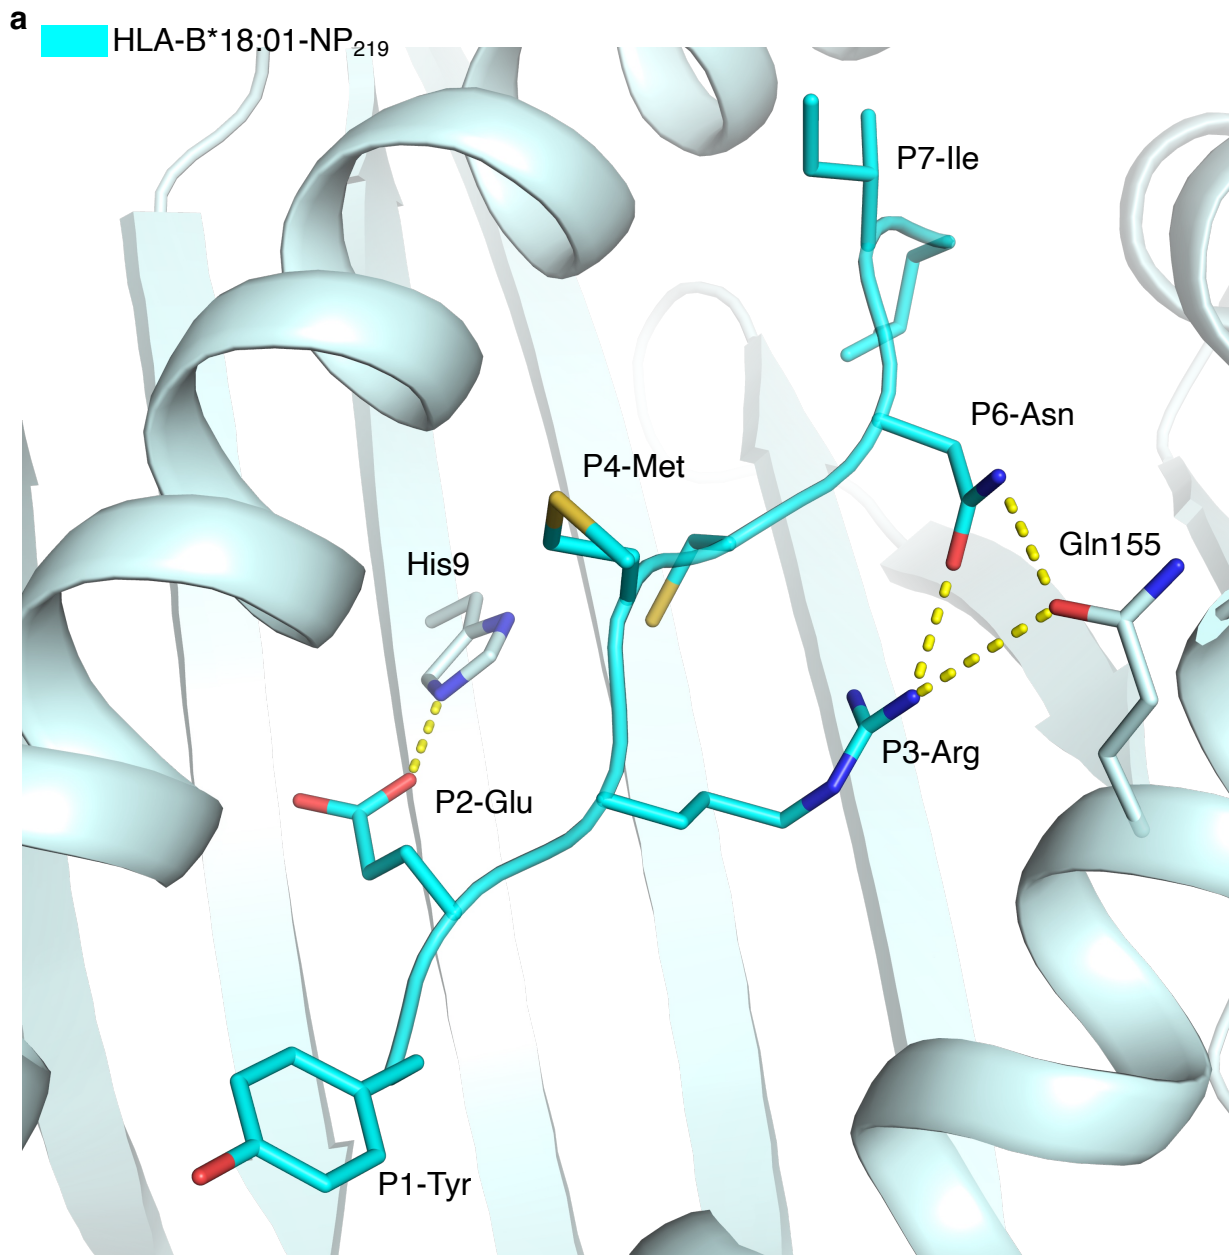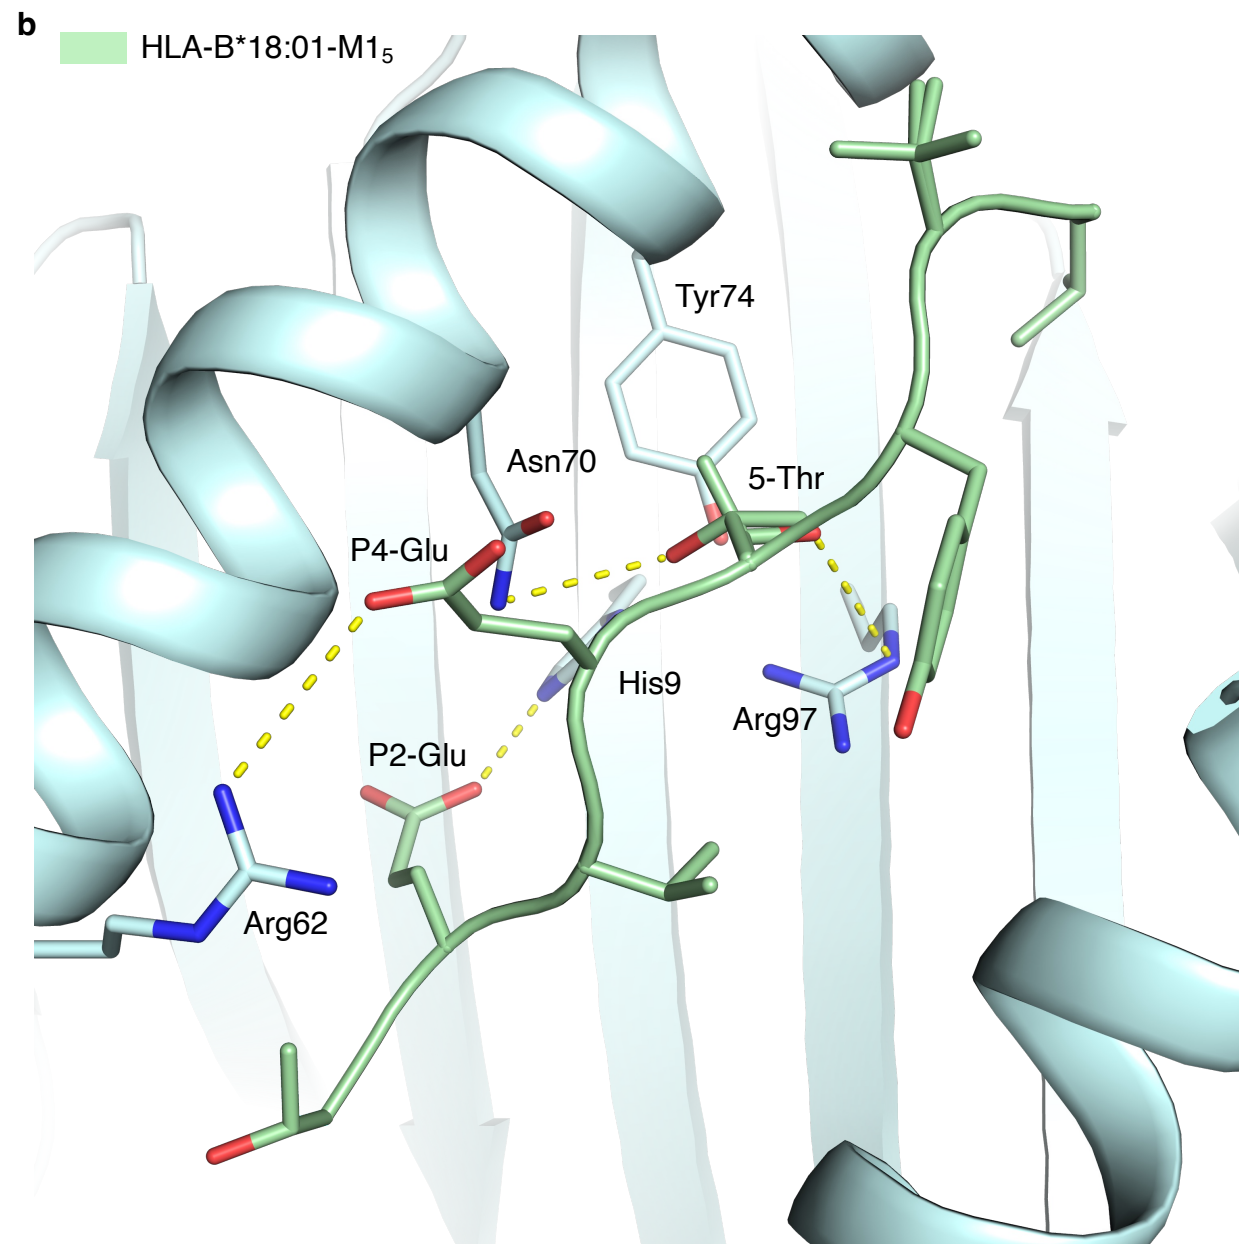

**Supplementary Figure 5. Hydrogen bonding network between the HLA-B\*18:01 binding pocket (light cyan) and the peptide residue side chains of NP<sub>219</sub> (cyan) and M1<sub>5</sub> (green).** (a) HLA-B\*18:01 (pale cyan) presenting the NP<sub>219</sub> peptide (cyan), with hydrogen bond as yellow dashed lines. (b) HLA-B\*18:01 (pale cyan) presenting the M1<sub>5</sub> peptide (green), with hydrogen bond as yellow dashed lines.

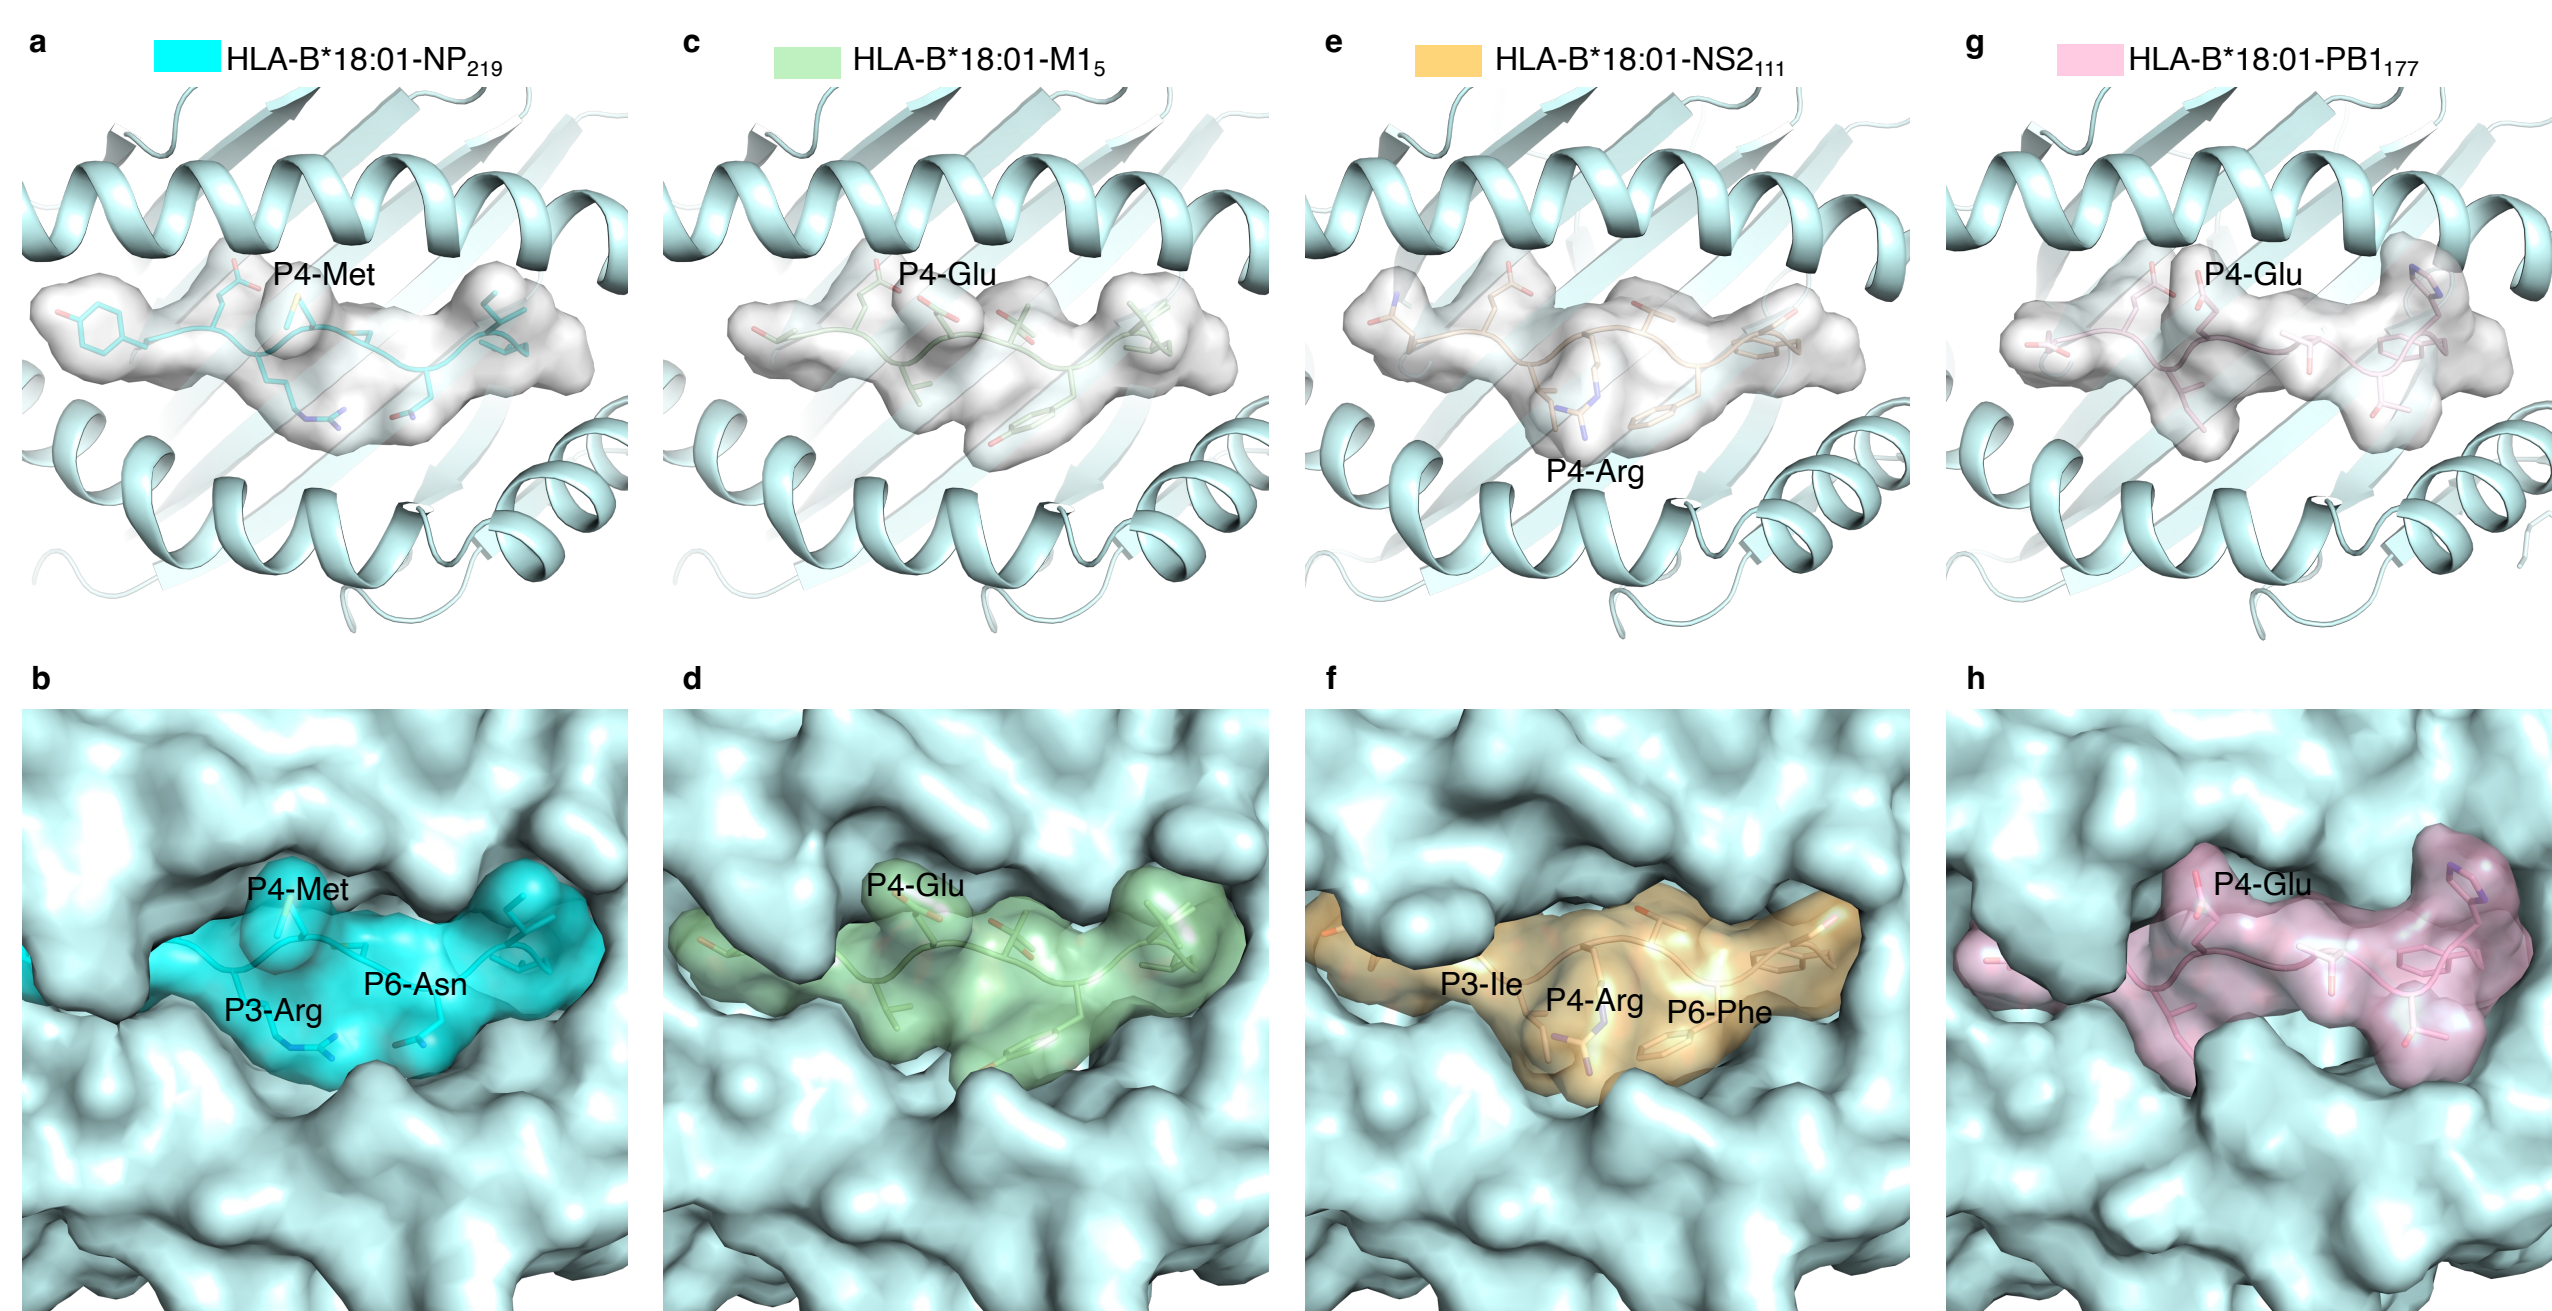

**Supplementary Figure 6. Top view of pHLA-B\*18:01 structures represented as surface.** Top-down view of peptide (**a, b**) NP<sub>219</sub> (cyan), (**c, d**) M1<sub>5</sub> (green), (**e, f**) NS<sub>2111</sub> (yellow), and (**g, h**) PB1<sub>117</sub> (pink). The HLA-B\*18:01 binding cleft (light cyan) represented as pale cyan cartoon on the top panels and as surface on the bottom panels.

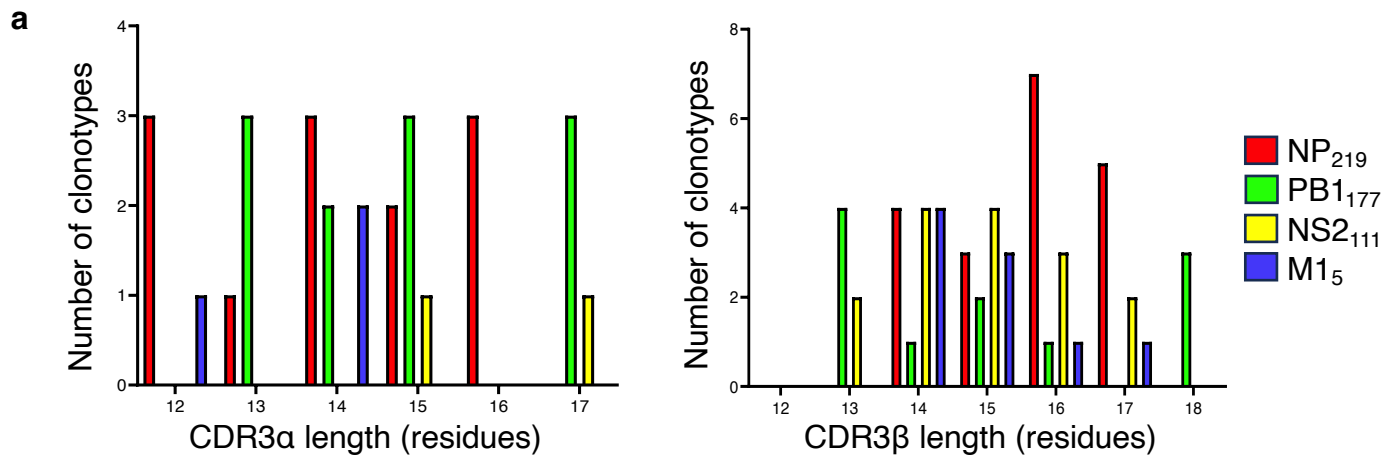

**Supplementary Figure 7. Distinct clonotype T cell receptor length and motif identification.** PB<sub>1177</sub>, NS<sub>2111</sub>, M<sub>15</sub> and NP<sub>219</sub> peptide specific T cell lines from three HLA-B\*18:01<sup>+</sup> donors were tetramer stained with the cognate peptide, single-cell sorted and subject to single-cell multiplex PCR. **(a)** The bar graph illustrates the length of the distinct TCR clonotype **(b-c)** Depicts the **(b)** CDR3α and **(c)** CDR3β motifs for the most common lengths of 14 and 15 amino acids long. Blank amino acid residues display no amino-acid preferences. Motif viewer of CDR3 was obtained via iceLogo (Colaert *et al*, *Nat Methods* 2009; **6**: 786-787).

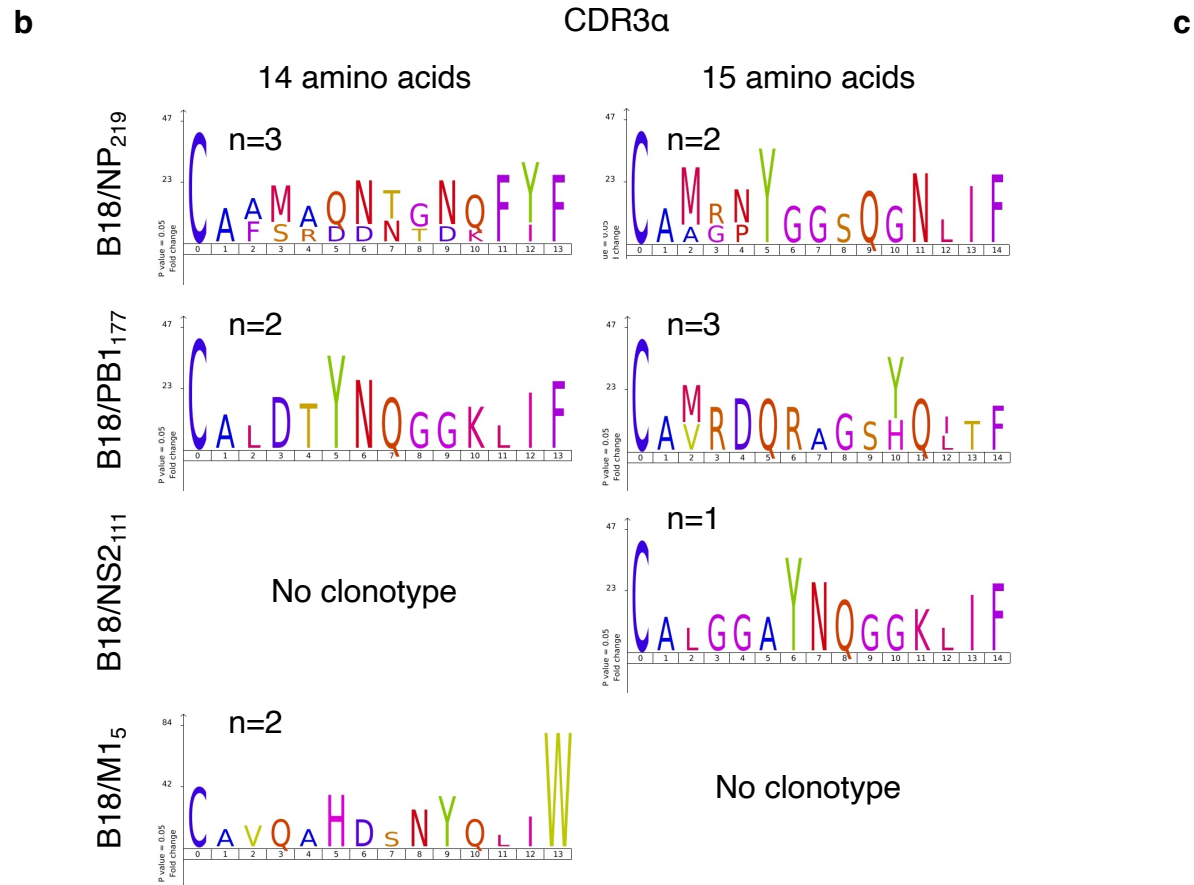

**Supplementary Table 1. Data Collection and Refinement Statistics**

| <b>Data Collection Statistics</b>                     | <b>HLA-B*18:01-NS2<sub>111</sub></b>           | <b>HLA-B*18:01-PB1<sub>177</sub></b>           | <b>HLA-B*18:01-NP<sub>219</sub></b>            | <b>HLA-B*18:01-M1<sub>5</sub></b>              |
|-------------------------------------------------------|------------------------------------------------|------------------------------------------------|------------------------------------------------|------------------------------------------------|
| Space group                                           | P 2 <sub>1</sub> 2 <sub>1</sub> 2 <sub>1</sub> |
| Cell Dimensions (a,b,c) (Å)                           | 50.76, 81.27, 109.89                           | 50.75, 81.63, 110.56                           | 50.85 81.48 111.30                             | 50.65, 81.14, 110.1                            |
| Resolution (Å)                                        | 46.08 – 1.15<br>(1.17 – 1.15)                  | 46.12 – 1.60<br>(1.63 – 1.60)                  | 46.25 – 1.40<br>(1.42 – 1.40)                  | 46.02 – 1.45<br>(1.47 – 1.45)                  |
| Total number of observations                          | 1182798<br>(56379)                             | 280508<br>(13853)                              | 716128<br>(34694)                              | 738504<br>(35754)                              |
| Number of unique observations                         | 159264<br>(7596)                               | 59129<br>(3078)                                | 91186<br>(4394)                                | 81219<br>(3941)                                |
| Multiplicity                                          | 7.4 (7.4)                                      | 4.7 (4.5)                                      | 7.9 (7.9)                                      | 9.1 (9.1)                                      |
| Data completeness (%)                                 | 98.7 (96.5)                                    | 97 (98.5)                                      | 99.6 (98.2)                                    | 100 (100)                                      |
| I/ <i>S</i> <sub>I</sub>                              | 13.3 (2.5)                                     | 10.3 (1.6)                                     | 15.6 (3.3)                                     | 14.9 (3.5)                                     |
| Mn(I) half-set correlation <i>CC</i> <sub>(1/2)</sub> | 99.9 (80.0)                                    | 99.7 (63.0)                                    | 99.9 (63.9)                                    | 99.8 (70.7)                                    |
| <i>R</i> <sub>pim</sub> <sup>a</sup> (%)              | 2.5 (29.1)                                     | 3.8 (38.9)                                     | 2.9 (27.5)                                     | 3.4 (26.1)                                     |
| <b>Refinement Statistics</b>                          |                                                |                                                |                                                |                                                |
| <i>R</i> <sub>factor</sub> <sup>b</sup> (%)           | 15.24                                          | 20.16                                          | 15.37                                          | 18.60                                          |
| <i>R</i> <sub>free</sub> <sup>b</sup> (%)             | 16.72                                          | 23.43                                          | 18.86                                          | 20.23                                          |
| Rms deviations from ideality                          |                                                |                                                |                                                |                                                |
| Bond lengths (Å)                                      | 0.004                                          | 0.007                                          | 0.009                                          | 0.001                                          |
| Bond angles (°)                                       | 0.79                                           | 0.92                                           | 1.03                                           | 1.25                                           |
| Ramachandran plot (%)                                 |                                                |                                                |                                                |                                                |
| Allowed region                                        | 98.42                                          | 98.64                                          | 98.68                                          | 98.68                                          |
| Disallowed region                                     | 0.00                                           | 0.00                                           | 0.26                                           | 0.26                                           |
| PDB code                                              | 8ROP                                           | 8RNH                                           | 8ROO                                           | 8RNG                                           |

<sup>a</sup> $R_{p.i.m} = S_{hkl} [1/(N-1)]^{1/2} S_i | I_{hkl, i} - \langle I_{hkl} \rangle | / S_{hkl} \langle I_{hkl} \rangle$ .

<sup>b</sup> $R_{factor} = S_{hkl} || F_o | - | F_c || / S_{hkl} | F_o |$  for all data except  $\approx 5\%$  which were used for *R*<sub>free</sub> calculation.



Supplementary Table 2. B18/NP<sub>219</sub> specific TCR sequences

| TRAV       | TRAJ  | CDR3 $\alpha$    | Length | TRBV                    | TRBJ   | CDR3 $\beta$      | Length | Number of sequences |       |       |
|------------|-------|------------------|--------|-------------------------|--------|-------------------|--------|---------------------|-------|-------|
|            |       |                  |        |                         |        |                   |        | SG10                | SG115 | SG131 |
| 14/DV4*01  | 4*01  | CSLREEFSGGFNKLIF | 16     |                         |        |                   |        | 1                   |       |       |
| 22*01      | 36*01 | CAPQSPWANNLFF    | 13     |                         |        |                   |        | 1                   |       |       |
|            |       |                  |        | 19*01/02                | 2-1*01 | CASSIDLTSGVYNEQFF | 17     | 1                   |       |       |
|            |       |                  |        | 19*01/02                | 2-5*01 | CASSIDYPSGVQETQYF | 17     | 2                   |       |       |
|            |       |                  |        | 19*01/02                | 2-7*01 | CASSTDLATGAYEQYF  | 16     | 1                   |       |       |
|            |       |                  |        | 19*01/02                | 2-7*01 | CASSIDLASGTTYEQYF | 17     | 1                   |       |       |
|            |       |                  |        | 2*01                    | 2-5*01 | CASSEGLGGLETQYF   | 17     | 1                   |       |       |
|            |       |                  |        | 2*01/02/03              | 2-5*01 | CASMGRDINQPQHF    | 14     | 1                   |       |       |
|            |       |                  |        | 4-1*01                  | 1-1*01 | CASSQDPGGTEAFF    | 14     | 1                   |       |       |
| 38-1*01    | 34*01 | CAFMRDDNTDKFIF   | 14     | 4-3*01                  | 2-7*01 | CASSQDFAGGSYEQYF  | 16     |                     | 1     |       |
| 29/DV5*01  | 42*01 | CAAGNYGGSQGNLIF  | 15     | 7-2*04                  | 1-2*01 | CASSLEAVSIHGYTF   | 15     |                     | 1     |       |
| 20*01/02   | 42*01 | CAVGREYGGSQGNLIF | 16     | 4-1*01                  | 2-2*01 | CASSQDKTTGELFF    | 14     |                     | 1     |       |
|            |       |                  |        | 6-5*01                  | 1-1*01 | CASSWGLEVNTEAFF   | 15     |                     | 1     |       |
|            |       |                  |        | 6-5*01                  | 1-1*01 | CASSYGLEANTEAFF   | 15     |                     | 1     |       |
| 14/DV4*03  | 8*01  | CVMREAMNTGFQKLVF | 16     |                         |        |                   |        |                     | 1     |       |
|            |       |                  |        | 4-3*01                  | 1-2*01 | CASSQDRGTGAYGYTF  | 16     |                     | 1     |       |
| 14/DV4*03  | 42*01 | CAMRPYGGSQGNLIF  | 15     | 4-3*01                  | 2-7*01 | CASSQDRASGEYEQYF  | 16     |                     |       | 1     |
| 29/DV5*01  | 49*01 | CAASAQNTGNQFYF   | 14     | 7-                      | 1-1*01 | CASSPSMRSGLAEAFF  | 16     |                     |       | 9     |
|            |       |                  |        | 2*01/02/04<br>or 7-8*01 |        |                   |        |                     |       |       |
| 29/DV5*01  | 49*01 | CAASAQNTGNQFYF   | 14     |                         |        |                   |        |                     |       | 6     |
| 22*01      | 20*01 | CAVVSNDYKLSF     | 12     |                         |        |                   |        |                     |       | 2     |
| 13-2*01/02 | 37*02 | CADSSNTGKLIF     | 12     |                         |        |                   |        |                     |       | 1     |
|            | 37*02 | CAEASNTGKLIF     | 12     |                         |        |                   |        |                     |       | 1     |
|            |       |                  |        | 19*03                   | 2-7*01 | CASSWDRGTGEQYF    | 14     |                     |       | 1     |
|            |       |                  |        | 4-3*01                  | 2-1*01 | CASSQDLASGTYNEQFF | 17     |                     |       | 3     |

|                                           |        |                  |           |          |           |
|-------------------------------------------|--------|------------------|-----------|----------|-----------|
| 7-<br>2*01/02/04<br>or 7-8*01<br>19*01/02 | 1*01   | CASSPSMRSGLAEAFF | 16        |          | 1         |
|                                           | 2-7*01 | CASSIDLAGGSYEQYF | 16        |          | 1         |
| <b>Total number of resolved sequences</b> |        |                  | <b>10</b> | <b>7</b> | <b>26</b> |

The  $\alpha\beta$ TCR repertoire of CD8<sup>+</sup> T cells from SG10, SG115 and SG131 specific for the B18/NP<sub>219</sub> tetramer. Length refers to the number of amino acids in the CDR3.

**Supplementary Table 3. B18/PB1<sub>177</sub> specific TCR sequences**

| TRAV                             | TRAJ  | CDR3 $\alpha$     | Length | TRBV       | TRBJ   | CDR3 $\beta$       | Length | Number of sequences |           |           |
|----------------------------------|-------|-------------------|--------|------------|--------|--------------------|--------|---------------------|-----------|-----------|
|                                  |       |                   |        |            |        |                    |        | SG10                | SG115     | SG131     |
| 1-2*01                           | 28*01 | CAVRDQYSGAGSYQLTF | 17     |            |        |                    |        | 1                   |           |           |
|                                  |       |                   |        | 10-3*04    | 2-1*01 | CAISEEGQGRDEQFF    | 15     | 1                   |           |           |
|                                  |       |                   |        | 10-2*02    | 1-2*01 | CASSLGTGGGYTF      | 13     | 2                   |           |           |
|                                  |       |                   |        | 3-2*03     | 2-5*01 | CASSQVLVGETQYF     | 14     | 2                   |           |           |
|                                  |       |                   |        | 4-3*02/03  | 2-3*01 | CASSSSGGGAGDTQYF   | 16     | 1                   |           |           |
|                                  |       |                   |        | 20-1*02/03 | 2-3*01 | CSASPERGTSVGTDTQYF | 18     | 1                   |           |           |
|                                  |       |                   |        | 19*01/02   | 1-1*01 | CASSIVERAEAFF      | 13     | 1                   |           |           |
| 1-2*01                           | 28*01 | CAVRDQRAGSYQLTF   | 15     |            |        |                    |        |                     |           | 3         |
| 1-2*01/03                        | 28*01 | CAVRDQRAGSYQLTF   | 15     |            |        |                    |        |                     |           | 12        |
| 1-2*01/03                        | 28*01 | CAVRDQLTGAGSYQLTF | 17     |            |        |                    |        |                     |           | 3         |
| 1-2*01/03                        | 28*01 | CAMRDQRGGSHQIPL   | 15     |            |        |                    |        |                     |           | 1         |
| 3*01                             | 13*01 | CAVRDSFGSGGYQKVTF | 17     |            |        |                    |        |                     |           | 1         |
|                                  |       |                   |        | 5-4*01     | 2-3*01 | CASSLLTGGTDTQYF    | 15     |                     |           | 2         |
|                                  |       |                   |        | 19*01/03   | 2-3*01 | RAGPGQRLWAPVF      | 13     |                     |           | 1         |
| 6*01/07                          | 23*01 | CALDTYNQGGKLIF    | 14     | 27*01      | 2-2*01 | CASSWVPPGQGRTGELFF | 18     |                     |           | 8         |
| 6*01/07                          | 23*01 | CALDTYNQGGKLIF    | 14     |            |        |                    |        |                     |           | 11        |
|                                  |       |                   |        | 27*01      | 2-2*01 | CASSWVPPGQGRTGELFF | 18     |                     |           | 1         |
| <b>Total number of sequences</b> |       |                   |        |            |        |                    |        | <b>9</b>            | <b>23</b> | <b>20</b> |

The  $\alpha\beta$ TCR repertoire of CD8<sup>+</sup> T cells from SG10, SG115 and SG131 specific for the B18/PB1<sub>177</sub> tetramer. Length refers to the number of amino acids in the CDR3.

**Supplementary Table 4. B18/NS2<sub>111</sub> specific TCR sequences**

| TRAV                                      | TRAJ   | CDR3            | Length | TRBV          | TRBJ      | CDR3 $\beta$       | Length | Number of sequences |          |                 |    |  |   |  |
|-------------------------------------------|--------|-----------------|--------|---------------|-----------|--------------------|--------|---------------------|----------|-----------------|----|--|---|--|
|                                           |        |                 |        |               |           |                    |        | SG10                | SG115    | SG131           |    |  |   |  |
| 6*01/07                                   | 23*01  | CALGGAYNQGGKLIF | 15     |               |           |                    |        | 1                   |          |                 |    |  |   |  |
|                                           |        |                 |        | 6-4*01/02     | 2-2*01    | CASSDSDGSGELFF     | 14     | 1                   |          |                 |    |  |   |  |
|                                           |        |                 |        | 20-1*01       | 2-1*01    | CSARDRQASSYNEQFF   | 16     | 2                   |          |                 |    |  |   |  |
|                                           |        |                 |        | 27*01         | 1-4*01    | CASSFLQGEKLFF      | 13     | 1                   |          |                 |    |  |   |  |
|                                           |        |                 |        | 27*01         | 1-2*01    | CASSLRPDPPYNEQFF   | 16     | 1                   |          |                 |    |  |   |  |
|                                           |        |                 |        | 27*01         | 1-1*01    | CASSPPGREDTEAFF    | 15     | 1                   |          |                 |    |  |   |  |
|                                           |        |                 |        | 18*01         | 1-1*01    | CASSPSEGLNTEAFF    | 15     | 1                   |          |                 |    |  |   |  |
|                                           |        |                 |        | 20-1*01       | 1-6*02    | CSARDGQGSSPLHF     | 14     | 1                   |          |                 |    |  |   |  |
|                                           |        |                 |        | 20-1*01/04/05 | 2-1*01    | CSANDRTSGSNYNEQFF  | 17     | 1                   |          |                 |    |  |   |  |
|                                           |        |                 |        | 15*02         | 1-5*01    | CATSRDRGWSNQPQHF   | 16     | 1                   |          |                 |    |  |   |  |
|                                           |        |                 |        | 4-1*01/02     | 1-6*01/02 | CASSQAGSLENSPLPLL  | 17     | 1                   |          |                 |    |  |   |  |
|                                           |        |                 |        | 2*02          | 2-7*01    | CASSTGRYYEQYF      | 13     | 1                   |          |                 |    |  |   |  |
|                                           |        |                 |        | 8-6*02        | 32*02     | CAVTEGPHYGGATNKLIF | 17     | 4-2*01              | 2-3*01   | CASSKGLAVDYTQYF | 15 |  | 1 |  |
|                                           |        |                 |        |               |           |                    |        | 12-3/4*01           | 2-3*01   | CASRLVSGTDTQYF  | 14 |  | 7 |  |
| 28*01                                     | 1-4*01 | CASSFLATNEKLFF  | 14     |               |           |                    |        |                     | 1        |                 |    |  |   |  |
| 20-1*04                                   | 2-2*01 | CSASLERMNTGELFF | 15     |               |           |                    |        |                     |          | 1               |    |  |   |  |
| <b>Total number of sequences resolved</b> |        |                 |        |               |           |                    |        | <b>13</b>           | <b>9</b> | <b>1</b>        |    |  |   |  |

The  $\alpha\beta$ TCR repertoire of CD8<sup>+</sup> T cells from SG10, SG115 and SG131 specific for the B18/NS2<sub>111</sub> tetramer. Length refers to the number of amino acids in the CDR3.

**Supplementary Table 5. B18/M1<sub>5</sub> specific TCR sequences**

| TRAV                                      | TRAJ  | CDR3            | Length | TRBV      | TRBJ   | CDR3 $\beta$      | Length | Number of sequences |           |          |
|-------------------------------------------|-------|-----------------|--------|-----------|--------|-------------------|--------|---------------------|-----------|----------|
|                                           |       |                 |        |           |        |                   |        | SG10                | SG115     | SG131    |
| 20*01/02                                  | 33*01 | CAVQAHDSDNYQLIW | 14     | 4-1*01/02 | 1-4*01 | CASRRTGVVEKLFF    | 14     | 3                   |           |          |
| 20*01/02                                  | 33*01 | CAVQAHDSDNYQLIW | 14     |           |        |                   |        | 5                   |           |          |
|                                           |       |                 |        | 4-1*01/02 | 1-4*01 | CASRRTGVVEKLFF    | 14     | 1                   |           |          |
|                                           |       |                 |        | 10-3*04   | 2-7*01 | CAISAPRGERDEQYF   | 15     | 5                   |           |          |
|                                           |       |                 |        | 4-3*01    | 2-3*01 | CASSQGPQVRGADTQYF | 17     |                     | 5         |          |
|                                           |       |                 |        | 27*01     | 1-3*01 | CASSLSWGPNTIYF    | 15     |                     | 4         |          |
|                                           |       |                 |        | 18*01     | 1-2*01 | CASSPTPGDPHYGYTF  | 16     |                     | 2         |          |
| 14/DV4*03                                 | 47*01 | CAMREDGNKLVF    | 12     | 27*01     | 2-5*01 | CASRSAGHQETQYF    | 14     |                     |           | 1        |
|                                           |       |                 |        | 27*01     | 2-5*01 | CASRSAGHQETQYF    | 14     |                     |           | 2        |
|                                           |       |                 |        | 19*01/02  | 2-1*01 | CASSLLAGVYNEQFF   | 15     |                     |           | 1        |
| <b>Total number of resolved sequences</b> |       |                 |        |           |        |                   |        | <b>14</b>           | <b>11</b> | <b>4</b> |

The  $\alpha\beta$ TCR repertoire of CD8<sup>+</sup> T cells from SG10, SG115 and SG131 specific for the B18/M1<sub>5</sub> tetramer. Length refers to the number of amino acids in the CDR3.
